# Supplementary material
Source: PubMed Central journal article supplement (PMC4966300)
Supplement: JCI86508.sd.pdf [file JCI86508.sd.pdf]

## Supplementary Information

### The NMD Pathway is Disrupted in Inflammatory Myofibroblastic Tumors

JingWei Lu<sup>1,2\*</sup>, Terra-Dawn Plank<sup>3\*</sup>, Fang Su<sup>4\*</sup>, XiuJuan Shi<sup>1</sup>, Chen Liu<sup>5</sup>, Yuan Ji<sup>6</sup>, Andrew Huynh<sup>3</sup>, Chao Shi<sup>4</sup>, Bo Zhu<sup>4</sup>, ShuaiJun Li<sup>1</sup>, Guang Yang<sup>1</sup>, YanMing Wu<sup>1</sup>, Miles F Wilkinson<sup>3,7,#</sup> & YanJun Lu<sup>1,#</sup>

\*Equal contributors

<sup>1</sup>Clinical and Translational Cancer Research Center, The Tenth People's Hospital, Tongji University School of Medicine, Shanghai, China.

<sup>2</sup> School of biotechnology of east china university of science and technology , Shanghai, China.

<sup>3</sup>Department of Reproductive Medicine, School of Medicine, University of California San Diego, La Jolla, California, USA.

<sup>4</sup>Department of Medical Oncology& Cardiothoracic Surgery& Pathology, The First Affiliated Hospital of Bengbu Medical College, Bengbu, Anhui Province, China.

<sup>5</sup>Institute of Aging Research, School of Medicine, Hangzhou Normal University, Zhejiang, China.

<sup>6</sup>Department of Pathology, Zhongshan Hospital, Fudan University, Shanghai, China.

<sup>7</sup>Institute for Genomic Medicine, University of California San Diego, La Jolla, California, USA.

#Correspondence should be addressed to Y.L. (yanjunlu@hotmail.com) or M.F.W. (mfwilkinson@ucsd.edu).



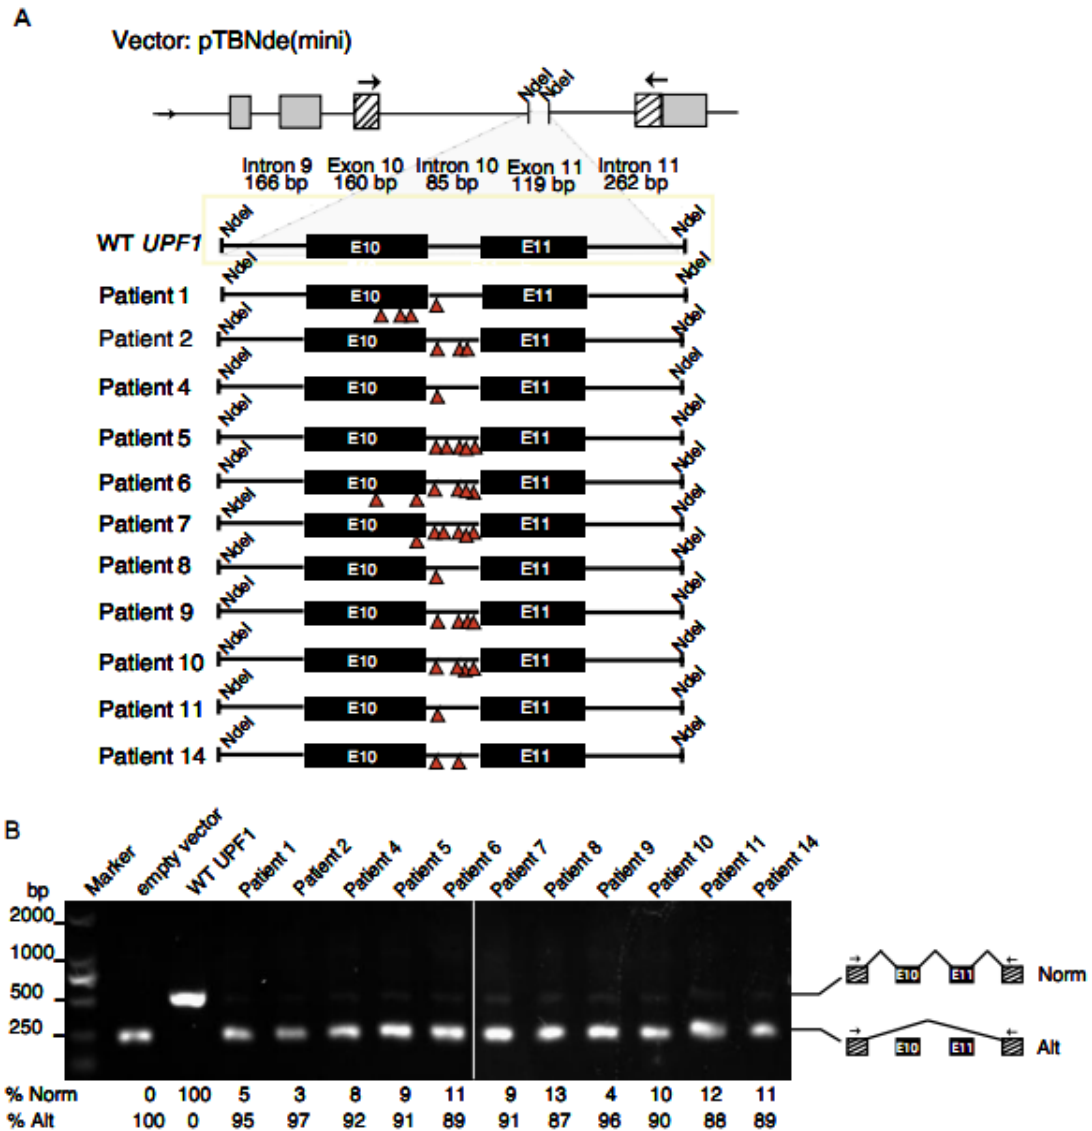

**Supplementary Figure 2. *UPF1* mutations in patient IMTs trigger alternative *UPF1* splicing.** (a) The indicated region of human *UPF1* (nt 22,779-23,570, RefSeq accession number NC\_000019.9) was cloned into the *NdeI* site of the pTBNde minigene construct and mutations (denoted by the red arrows) were introduced to match those in patient 1, 2, 4-11 and 14. (b) RT-PCR analysis of HEK293 cells transfected with the constructs shown in panel a (primer locations are indicated by the arrows). Direct sequencing of the large (518 bp) and small (239 bp) bands indicated that they correspond to normally spliced and exon-skipped transcripts, respectively. The numbers below the gel are the average values (based on densitometry) from five independent transfections. The lanes were run on the same gel but were noncontiguous.

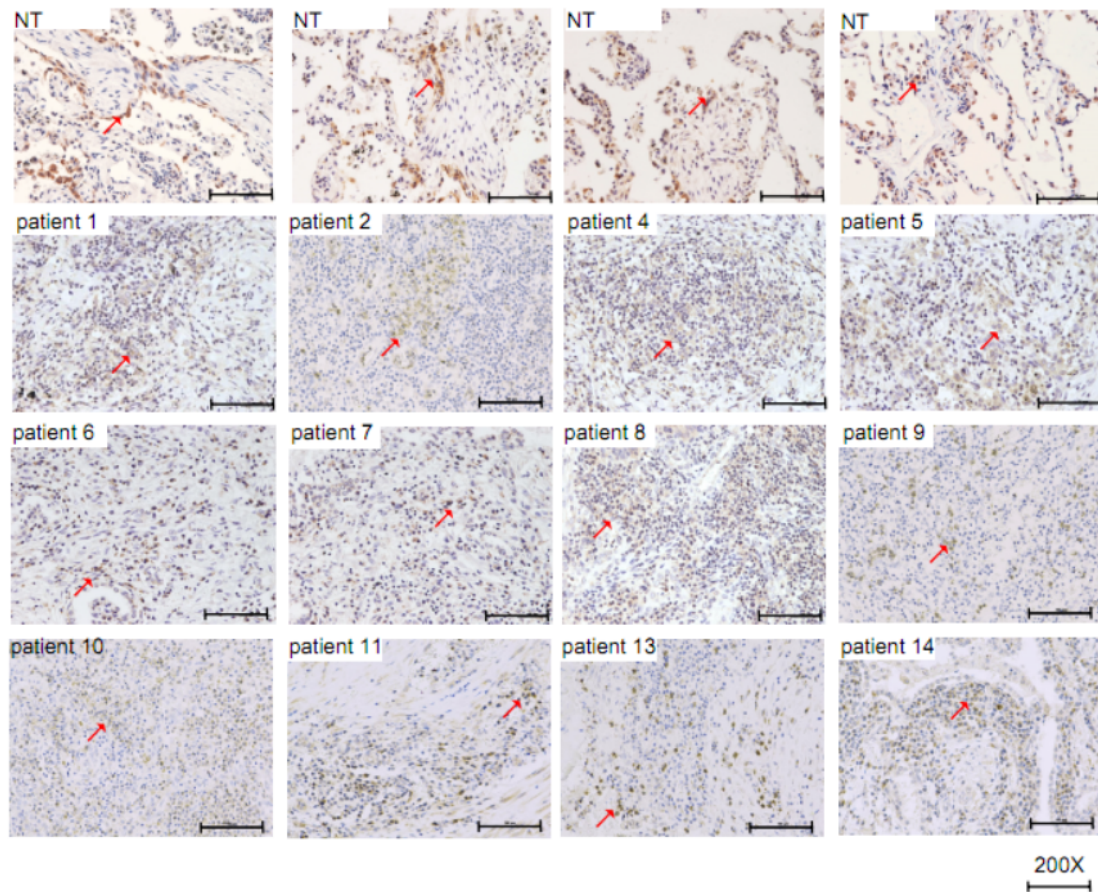

**Supplementary Figure 3. UPF1 protein expression in patient IMTs.** Immunohistochemical (IHC) analysis of IMTs from patients 1, 2, 4-11, and 13-14, and normal lung tissue (NT) from patients 1, 2, 4 and 5. Red arrows indicate selected areas of positive UPF1 antibody staining. The staining was mainly observed in the inflammatory cells, while lung epithelial cells exhibited weak or negative staining.

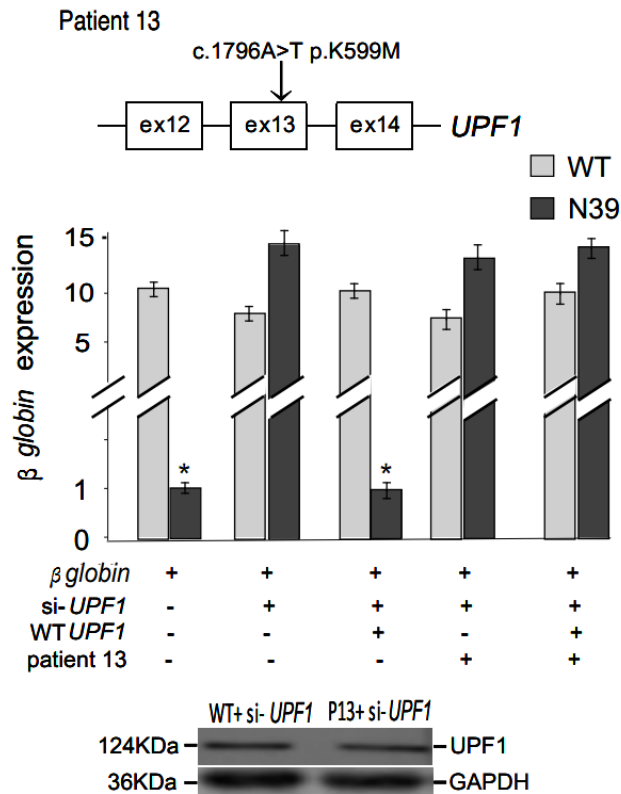

**Supplementary Figure 4. The mutant UPF1 protein encoded by patient 13 has dominant-negative activity.** Upper: RT-qPCR analysis of NMD activity, determined by comparing the level of wild-type (WT)  $\beta$ -globin mRNA with  $\beta$ -globin mRNA harboring a premature termination codon at codon position 39 (N39). N39  $\beta$ -globin mRNA is degraded by NMD, while WT  $\beta$ -globin mRNA is not. Patient 13 has a missense mutation in *UPF1*, which we introduced by site-directed mutagenesis into a *UPF1* expression vector.  $\beta$ -globin constructs expressing these mRNAs were transiently transfected into HEK293 cells, along with a WT *UPF1* expression vector and/or a *UPF1* vector expressing the K559M mutant (patient 13). *UPF1* siRNA (si-*UPF1*) was co-transfected to deplete endogenous *UPF1*. Error bars indicate standard deviations from three independent experiments; the solid horizontal bar represents the median value for each group. 18S mRNA was used as the endogenous control. Statistical analysis was performed using the Student's t test, \* $P < 0.05$ . Lower: Western blot analysis of *UPF1* expression in HEK293 cells depleted of endogenous *UPF1* by siRNA and transfected with WT or patient 13 (P13) *UPF1* expression vectors. GAPDH is the endogenous control.

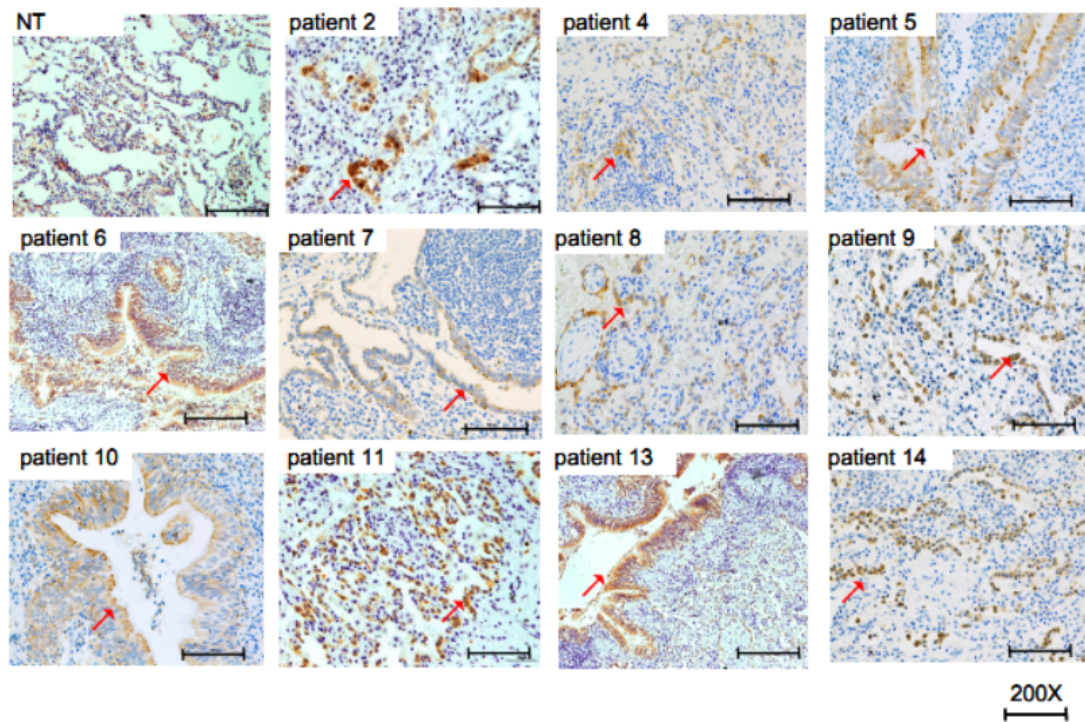

**Supplementary Figure 5. NIK protein expression in patient IMTs.** IHC analysis of IMTs from patients 2, 4-11, 13-14 and corresponding normal tissue (NT) of patient 2. Red arrows indicate selected areas of positive cytoplasmic NIK antibody staining. The staining was mainly observed in the lung epithelial cells while the inflammatory cells exhibited weak or negative staining for NIK.

## Supplementary tables

**Supplementary Table 1. Somatically Acquired *UPF1* Mutations in Patients with Pulmonary Inflammatory Myofibroblastic Tumors**

| Patient No. | Age (yr) | Sex | Location    | No. of Mutations | Nucleotide Change | Predict Amino Acid Change | Mutation Type | Genotype     |
|-------------|----------|-----|-------------|------------------|-------------------|---------------------------|---------------|--------------|
| 1           | 55       | F   | right upper | 4                | c.1395G>A         | p.P469S                   | synonymous    | homozygous   |
|             |          |     |             |                  | c.1405C>T         |                           | missense      | homozygous   |
|             |          |     |             |                  | c.1416C>T         |                           | synonymous    | homozygous   |
|             |          |     |             |                  | IVS10+4C>A        |                           | intronic      | homozygous   |
| 2           | 52       | F   | left lower  | 3                | IVS10+4C>A        |                           | intronic      | heterozygous |
|             |          |     |             |                  | IVS10+32C>T       |                           | intronic      | homozygous   |
|             |          |     |             |                  | IVS10+37G>A       |                           | intronic      | heterozygous |
| 3           | 45       | M   | left lower  | 0                |                   |                           |               |              |
| 4           | 47       | M   | left lower  | 1                | IVS10+4C>A        |                           | intronic      | heterozygous |
|             |          |     |             |                  | IVS10+4C>A        |                           | intronic      | heterozygous |
|             |          |     |             |                  | IVS10+18C>T       |                           | intronic      | heterozygous |
|             |          |     |             |                  | IVS10+32C>T       |                           | intronic      | heterozygous |
| 5           | 45       | M   | left upper  | 5                | IVS10+37G>A       |                           | intronic      | heterozygous |
|             |          |     |             |                  | IVS10+38C>T       |                           | intronic      | heterozygous |
|             |          |     |             |                  | c.1383G>A         |                           | synonymous    | heterozygous |
|             |          |     |             |                  | c.1421C>A         | p.S474Y                   | missense      | heterozygous |
| 6           | 41       | M   | right lower | 6                | IVS10+4C>A        |                           | intronic      | heterozygous |
|             |          |     |             |                  | IVS10+32C>T       |                           | intronic      | heterozygous |
|             |          |     |             |                  | IVS10+37G>A       |                           | intronic      | heterozygous |
|             |          |     |             |                  | IVS10+38C>T       |                           | intronic      | heterozygous |
| 7           | 76       | M   | right upper | 6                | c.1421C>A         | p.S474Y                   | missense      | heterozygous |
|             |          |     |             |                  | IVS10+4C>A        |                           | intronic      | heterozygous |
|             |          |     |             |                  | IVS10+18C>T       |                           | intronic      | heterozygous |
|             |          |     |             |                  | IVS10+32C>T       |                           | intronic      | heterozygous |
| 8           | 73       | M   | left upper  | 1                | IVS10+37G>A       |                           | intronic      | heterozygous |
|             |          |     |             |                  | IVS10+38C>T       |                           | intronic      | heterozygous |
|             |          |     |             |                  | IVS10+4C>A        |                           | intronic      | heterozygous |
|             |          |     |             |                  | IVS10+4C>A        |                           | intronic      | heterozygous |
| 9           | 66       | M   | right upper | 4                | IVS10+32C>T       |                           | intronic      | heterozygous |
|             |          |     |             |                  | IVS10+37G>A       |                           | intronic      | heterozygous |
|             |          |     |             |                  | IVS10+25C>T       |                           | intronic      | heterozygous |
|             |          |     |             |                  | IVS10+4C>A        |                           | intronic      | heterozygous |
| 10          | 66       | M   | left lower  | 4                | IVS10+32C>T       |                           | intronic      | heterozygous |
|             |          |     |             |                  | IVS10+37G>A       |                           | intronic      | heterozygous |
|             |          |     |             |                  | IVS10+25C>T       |                           | intronic      | heterozygous |

|    |    |   |             |   |             |         |          |              |
|----|----|---|-------------|---|-------------|---------|----------|--------------|
| 11 | 60 | M | right lower | 1 | IVS10+4C>A  |         | intronic | heterozygous |
| 12 | 68 | M | left        | 0 |             |         |          |              |
| 13 | 73 | M | right lower | 1 | c.1796A>T   | p.K599M | missense | heterozygous |
|    |    |   |             |   | IVS10+4C>A  |         | intronic | heterozygous |
| 14 | 61 | M | left upper  | 3 | IVS10+32C>T |         | intronic | homozygous   |
|    |    |   |             |   | IVS10+37G>A |         | intronic | homozygous   |
| 15 | 50 | F | right upper | 2 | IVS10+4C>A  |         | intronic | heterozygous |
|    |    |   |             |   | IVS10+32C>T |         | intronic | heterozygous |

---

**Supplementary Table 2. UPF1 and NIK Protein Expression in IMTs and Inflammatory Cells**

| Patient No. | UPF1 status       | UPF1 IHC signal    |                       | NIK IHC signal     |                       |
|-------------|-------------------|--------------------|-----------------------|--------------------|-----------------------|
|             |                   | inflammatory cells | lung epithelial cells | inflammatory cells | lung epithelial cells |
| 1           | splicing mutation | +                  | —                     | —                  | +                     |
| 2           | splicing mutation | +                  | —                     | —                  | +                     |
| 3           | WT                | +                  | +                     | —                  | —                     |
| 4           | splicing mutation | +                  | —                     | —                  | +                     |
| 5           | splicing mutation | +                  | —                     | —                  | +                     |
| 6           | splicing mutation | +                  | —                     | —                  | +                     |
| 7           | splicing mutation | +                  | —                     | —                  | +                     |
| 8           | splicing mutation | +                  | —                     | —                  | +                     |
| 9           | splicing mutation | +                  | —                     | —                  | +                     |
| 10          | splicing mutation | +                  | —                     | —                  | +                     |
| 11          | splicing mutation | +                  | —                     | —                  | +                     |
| 12          | WT                | +                  | +                     | —                  | —                     |
| 13          | missense mutation | +                  | +                     | —                  | +                     |
| 14          | splicing mutation | +                  | —                     | —                  | +                     |
| 15          | splicing mutation | +                  | —                     | —                  | +                     |

IHC: immunological histological chemistry

+, antibody reactivity in >30% of cells

-, antibody reactivity in <10% of cells

**Supplementary Table 3. Evidence that NMD is Disrupted in IMTs**

| Gene                                              | Function                | Putative NMD-inducing feature | Relative increase | Reference |
|---------------------------------------------------|-------------------------|-------------------------------|-------------------|-----------|
| Asparagine synthetase (ASNS)                      | Asparagine biosynthesis | uORF                          | 4.6               | 9         |
| Cystathionine-g-lyase (CTH)                       | Cysteine biosynthesis   | Unknown                       | 3.5               | 9         |
| Pyrroline-5-carboxylate reductase 1 (PYCR1)       | Proline biosynthesis    | Unknown                       | 7.1               | 9         |
| Phosphoglycerate dehydrogenase (PHGDH)            | Serine biosynthesis     | uORF                          | 5.9               | 9         |
| CysteinyI-tRNA synthetase (CARS)                  | tRNA charging           | Unknown                       | 3.8               | 9,10      |
| Seryl-tRNA synthetase (SARS)                      | tRNA charging           | Unknown                       | 4.5               | 9,10      |
| Leucyl-tRNA synthetase,mitochondrial (LARS2)      | tRNA charging           | uORFs                         | 6.4               | 9         |
| Nephropathic cystinosis (CTNS)                    | Amino acid transport    | uORF                          | 5.3               | 9,10      |
| Glutamate/neutral amino acid transporter (SLC1A4) | Amino acid transport    | Unknown                       | 6.5               | 9         |
| Activating transcription factor 3 (ATF3)          | Transcription factor    | Alt. exon with PTC            | 5.1               | 9         |
| Activating transcription factor 4 (ATF4)          | Transcription factor    | uORFs                         | 6.1               | 9,10      |

RT-qPCR analysis of the expression ratio of the indicated NMD substrates in patient 15 IMT vs. NT. These endogenous NMD substrates were previously defined on the basis of being stabilized upon depletion of the NMD factor UPF1 in HeLa cells (*ASNS*, *CARS*, *SARS*, *ATF3*, *CTH*, *PYCR1*, *PHGDH*, *LARS2*, *CTNS*, *SLC1A4*, and *ATF4*) (9) or upregulated upon depletion of UPF1 and CHX treatment in mouse ES cells (*Ctns*, *Atf4*, *Sars*, and *Cars*) (10). The values shown reflect three replicates of RT-qPCR, using 18S rRNA as a normalization control.

**Supplementary Table 4. *UPF1* DNA Sequencing Primers**

| Target    | Sequence |                       | Sequence |                       |
|-----------|----------|-----------------------|----------|-----------------------|
| exon1     | f        | GCAGTTCCTGCTCTAGGCTG  | F        | GCAGTTCCTGCTCTAGGCTG  |
|           | r        | GATTGCAGGACCTGGGGCAG  | R        | TAAGCTCAGGCCGAGCCAGAG |
| exon2     | f        | GGCATGGACATGGCTCTGTG  | F        | GGTTAGACCAGCTGTGTGGG  |
|           | r        | TCAGGGTGTCTGGAGGTTGCT | R        | CACCTCCTGACCGGTAACAG  |
| exon3     | f        | CAGCAGGACTCTCCTTGAG   | F        | TGCTCCTTATCCCCTCGGAG  |
|           | r        | AGATCAGCGGGTGTGCCAAG  | R        | ACCCAGGTTTGTAGCGTG    |
| exon4     | f        | GGATGAGGTGTGACTGCCTC  | F        | ATGGACCGTGAACGGTACCG  |
|           | r        | AACGCTCTCATGCCTCACCC  | R        | TGGAGGACAACCTCCCTGGAG |
| exon5     | f        | CAGAGCTCAAGTGCACAGGG  | F        | ATGCAGGGCATGCCCTTTG   |
|           | r        | TCTCACTGGGTCAAGCCGTC  | R        | TCCCCGCAACCAGAAACCAC  |
| exon6     | f        | CCTGTGTGGCATGGAGTTCC  | F        | AGGGTTCTCCTTGACAGGTGG |
|           | r        | ACATCAGCTCCCACAGCCTG  | R        | CTCTGGAAGCCTGAGGAGAG  |
| exon7-8   | f        | ACGGCAGAGGCTTGCTGTAG  | F        | CTGTGCTGGAGGCTAACC    |
|           | r        | AAGAGCAGTGGAGGGCGATG  | R        | AGCATGAGATGCTGGCCAG   |
| exon9     | f        | CGGCTCATGGTGAGGTAGAG  | F        | AGCGTTTGGTGCAGAGCCAG  |
|           | r        | GAACCCCACTCCACAGTGAC  | R        | AGATGCCACAGGTGGCAACC  |
| exon10-11 | f        | GTCAGTGTGGAGTGGGGTTC  | F        | ACTCAGGATGTCGGAGAGGC  |
|           | r        | AGAGAGCGGTAGGCACCATG  | R        | CACGTGCTCTCTTCGGTGTG  |
| exon12-13 | f        | AGCCCAGGATGTTGAGGCTG  | F        | TCACACCACTGCACTCCAGC  |
|           | r        | TTCCAGGCAGCGAGATGTCC  | R        | ACAACTGAGCGCAGAGAGGC  |
| exon14-15 | f        | TCACCACAGCCTGGACCATG  | F        | TGTCTGGGAGGGACAGCTTG  |
|           | r        | TGCCCTGACCTCAAGCAGTG  | R        | GAAGCTGATGGGCCAGTTCC  |
| exon16-17 | f        | AGGACCTGCAGCACTGTAGC  | F        | TTGCCCTGTGTCTGAACTCA  |
|           | r        | TCCTGGGCCATTCTGAGCTC  | R        | AGGAGACCAAGTGTGCCCGAG |
| exon18    | f        | TCTAGCCTGGGTGACAGAGC  | F        | GCCTGCTGGCTGATAGTGAC  |
|           | r        | CTGCTCAGAGTCCTCTGACC  | R        | GGAAGTGAGGACCGATGAGC  |
| exon19-20 | f        | GTGTGCAGGGTCAGTGGCTTG | F        | TCTTGACCGTCCTGTGAGA   |
|           | r        | AAGCTGCAGCCATGGGAACG  | R        | ATCCCGGTGTGAGGACAAGG  |
| exon21-23 | f        | ATCTTCAGCCTGGGCAGAGC  | F        | CAGGACAGATGTGCAGCTCC  |
|           | r        | ATACCACCCCTCCAGTGACG  | R        | CCCATCCTTCTCCTTGAGGC  |
| exon24    | f        | GTACCTGTGGGGCTCAGGTC  | F        | TGCCCTTCTCCCTCCTGACAG |
|           | r        | GGGTTTGTCAAGGCTGCTGC  | R        | TACCCGGTGCATGCCTCTAC  |

**Supplementary Table 5. RT-PCR Primers**

| Target                  | Sequence |                                   |
|-------------------------|----------|-----------------------------------|
| <i>UPF1</i> cDNA E7-12  | f        | TCACTGTCAG GTGGGACCTG             |
|                         | r        | GATCTGGTTGTGCAGGGCCA              |
|                         | F        | CGCCTACTTC ACTTTGCCCA             |
|                         | R        | GTCCACGGCGATGTTGCTC               |
| Minigene expression     | F        | CAACTTCAAGCTCCTAAGCCACTGC         |
|                         | R        | TAGGATCCGGTCACCAGGAAGTTGGTTAAATCA |
| Germline Cε transcripts | F        | CGTCTCGGGTGCGTGGGC                |
|                         | R        | CAGGTGATCGTGGGCGACT               |

**Supplementary Table 6. RT-qPCR Primers**

| Target               | Sequence |                                    |
|----------------------|----------|------------------------------------|
| <i>β-globin-NS39</i> | F        | TTTTCTCGAGACACCATGGTGCACCTGACTCCTG |
|                      | R        | CTTAGGGTTGCCCATAACAG               |
| <i>WT β-globin</i>   | F        | GCAACCCTAAGGTGAAGGCT               |
|                      | R        | GGACAGCAAGAAAGCGAGC                |
| <i>UPF1</i>          | F        | GACG CAGGGCTACA TCTCCA             |
|                      | R        | CGTTGCTTAGCTCTTCCGCC               |
| <i>NIK</i>           | F        | TTCATCGCTGGGTCCAAACA               |
|                      | R        | CAACACACACGGGCCATTTT               |
|                      | R        | GCACTTCTGTTCCTCGCAGA               |
| <i>IL-8</i>          | F        | CACTGCGCCAACACAGAAAT               |
|                      | R        | GCTTGAAGTTTCACTGGCATC              |
| <i>CCL20</i>         | F        | CTGCTACTCCACCTCTGCG                |
|                      | R        | TGCGCACACAGACAACCTTTT              |
| <i>CXCL1</i>         | F        | CTTGCCTCAATCCTGCATCCC              |
|                      | R        | CTCTGCAGCTGTGTCTCTCTT              |
| <i>CTH</i>           | F        | TGCTTCAGGTTTAGCAGCCA               |
|                      | R        | TCAGATGCCACTTGCCTGAA               |
| <i>PYCR1</i>         | F        | CAAGGGCTTCACAGCAGCA                |
|                      | R        | CCTTGTTGTGGGGTGTCAAC               |
| <i>PHGDH</i>         | F        | TGCAAATCTGCGGAAAGTGC               |
|                      | R        | GATGACATCAGCGGTCACCT               |
| <i>CARS</i>          | F        | CTGAAGATCTTTGGGGCCGT               |
|                      | R        | AGGGACTTTTTGCTCTCGGG               |
| <i>SARS</i>          | F        | TGCAGCAAGACAATCGGAGA               |
|                      | R        | CGTCACACTTCAGGATGGCT               |
| <i>LARS2</i>         | F        | AGCCTGTGAGCAGATCCAGA               |
|                      | R        | TGGCCCACCATTTAGCTGTC               |
| <i>CTNS</i>          | F        | CGCTTTCTTGTGATCCGCAG               |
|                      | R        | GTCAGGTTTCAAGCCACGAA               |
| <i>ASNS</i>          | F        | CATGGAAGACAGCCCCGATT               |
|                      | R        | CATCCAGAGCCTGAATGCCT               |
| <i>SLC1A4</i>        | F        | GTGGCCTTGGCGTTCATCAT               |
|                      | R        | AGCTGCAACCACAAGATTGG               |
| <i>ATF3</i>          | F        | TGATGCTTCAACACCCAGGC               |
|                      | R        | CCTGGCCTGGGTGTTGAAG                |

|                 |   |                      |
|-----------------|---|----------------------|
| <i>ATF4</i>     | F | AACCTCATGGGTTCTCCAGC |
|                 | R | GGTCATCTATACCCAACAGG |
| <i>TRAF2</i>    | F | GCGCTGCGACCGTTGG     |
|                 | R | CAGGCAGAAGGAGCAGTACC |
| <i>18S</i>      | F | AGTCTAGAGCCACCGTCCAG |
|                 | R | CCTACCTAGAATGTGGCTG  |
| <i>NIK-uORF</i> | F | TCTACAAGCTTGAGGCCGTG |
|                 | R | GGACCCAGCGATGAAAATGC |

---

### Supplementary Table 7. Construct Primers

| Target                         | Sequence |                                   |
|--------------------------------|----------|-----------------------------------|
| <b>E10-11 Hybrid Mini-gene</b> | F        | GGAATTCCATATGCGTCTTCTCCCATCACTGCC |
|                                | R        | GGAATTCCATATGACACGGAATCACGCTGCTG  |
| <b><i>NIK uORF</i> Hybrid</b>  | F        | AAGCTTGGGGCGACCACGGGCCGGGA        |
| <b>PGL3-control</b>            | R        | CTTTATGTTTTTGGCGTCTTCATGG         |

---

**Supplementary Table 8. Primers for Site-directed Mutagenesis**

| Target                        | Sequence |                                  |
|-------------------------------|----------|----------------------------------|
| Mutagenic minigene            | F        | GGGAGGCCCTGTGCCGTGAAGCG          |
| c.1395G>A                     | R        | CGCTTCACGGCACAGGGCCTCCC          |
| Mutagenic minigene            | F        | GGTTGAGGTCGGAGAGGCCCTGCGC        |
| c.1405C>T                     | R        | GCGCAGGGCCTCTCCGACCTCAACC        |
| Mutagenic minigene            | F        | CCTGGGAGTGATTGAGGTCGGGGAGG       |
| c.1416C>T                     | R        | CCTCCCCGACCTCAATCACTCCCAGG       |
| Mutagenic minigene            | F        | CACTCCCAGGTGAGCGCCGTCCTCA        |
| IVS10+4C>A                    | R        | TGAGGACGGCGCTCACCTGGGAGTG        |
| Mutagenic minigene            | F        | CCGGCCCATGGACGAGGCCCCGC          |
| IVS10+32C>T                   | R        | GCGGGGCCTCGTCCATGGGCCGG          |
| Mutagenic minigene            | F        | AGGCCCGCGCACTGAGGACGGC           |
| IVS10+18C>T                   | R        | GCCGTCCTCAGTGCGCGGGGCCT          |
| Mutagenic minigene            | F        | TCCCGGCCTATGGGCGAGGCCCG          |
| IVS10+37G>A                   | R        | CGGGGCCTCGCCCATAGGCCGGGA         |
| Mutagenic minigene            | F        | CACGCACAGCTATGGCCGCCTCTCCG       |
| IVS10-38C>T                   | R        | CGGAGAGGCGGCCATAGCTGTGCGTG       |
| Mutagenic minigene            | F        | GCCGTGAAGCGTTTGGGCAGCTGGCAC      |
| c.1383G>A                     | R        | GTGCCAGCTGCCCAAACGCTTCACGGC      |
| Mutagenic minigene            | F        | CATAAACCTGGTAGTGGTTGAGGTCGGGGAGG |
| c.1421C>A                     | R        | CCTCCCCGACCTCAACCACTACCAGGTTTATG |
| Mutagenic minigene            | F        | GGGGTTGGCAACACGCACAGCTGTGGC      |
| IVS10-25C>T                   | R        | GCCACAGCTGTGCGTGTTGCCAACCCC      |
| Mutagenic <i>UPF1</i> plasmid | F        | GGTACCGGGCCTTGATGCGCACCG         |
| c.1796A>T                     | R        | CGGTGCGCATCAAGGCCCGGTACC         |
| Mutagenic <i>UPF1</i> plasmid | F        | GGTTGAGGTCGGAGAGGCCCTGCGC        |
| c.1405C>T                     | R        | GCGCAGGGCCTCTCCGACCTCAACC        |
| Mutagenic <i>UPF1</i> plasmid | F        | CATAAACCTGGTAGTGGTTGAGGTCGGGGAGG |
| c.1421C>A                     | R        | CCTCCCCGACCTCAACCACTACCAGGTTTATG |
| Mutagenic <i>NIK</i> plasmid  | F        | GCGCTTGGCCGGTTGAGCACAAGCC        |
| c.-19A>T                      | R        | GGCTTGTGCTCAACCGGCCAAGCGC        |

**Supplementary Table 9. Small Interfering RNAs**

| Target Gene | Sequence                  |
|-------------|---------------------------|
| <i>UPF1</i> | GATGCAGTTCCGCTCCATT       |
|             | GAGAATCGCCTACTTCACT       |
|             | GCTCGCAGACTCTCACTTT       |
| <i>NIK</i>  | GTGTGAAAGTCCAAATACA       |
|             | CAGGCTGAGTGTGAGAATA       |
|             | CGCCAAATCAAGCCAATTA       |
| <i>con</i>  | GUANGZHOU RIBOBIO CO.,LTD |

## Supplemental Methods

### DNA/RNA sequencing and analysis

Genomic DNA from the FFPE samples was extracted using QIAamp DNA FFPE Tissue Kit (Qiagen). All *UPF1* coding regions and exon-intron junctions (RefSeq accession number NC\_000019.9) were amplified by nested PCR using the primers described in Supplementary Table 4. Total RNA from the patient's samples and cell lines was extracted using Trizol (Invitrogen). To prevent contamination with genomic DNA, the samples were treated with RNase-free DNase I (Fermentas). The synthesis of complementary DNA (cDNA) was performed using the PrimeScript™ RT reagent Kit (Takara). Reverse transcription-polymerase chain reaction (RT-PCR) was performed with primers in Supplementary Table 5. Quantitative real-time reverse transcription PCR (RT-qPCR) analysis was performed using the relative quantification method ( $\Delta\Delta CT$ ) in a RotorGene RG-3000 thermal cycler system (Corbett Research). *18S* mRNA was used as the endogenous control. Primers are described in Supplementary Table 6. All samples were evaluated in triplicate.

### Constructs

Human *UPF1* expression vector was previously described (5). Human *NIK* corresponding to the 5' untranslated region (5' UTR, RefSeq accession number NM\_003954.4) was amplified with the primers described in

Supplementary Table 7. The PCR products were cloned into the HindIII/NcoI site of the PGL3-control plasmid encoding firefly luciferase (Promega), and the NdeI site of the vector pTBNde (min), a gift from Dr. Francisco E. Baralle (International Centre for Genetic Engineering and Biotechnology, Italy). Site Directed Mutagenesis or point mutations were introduced by using the KOD-Plus-Neo kit (Toyobo) and the DpnI enzyme (Takara). Primer sequences are provided in Supplementary Table 8. Wild type *β-globin* construct and mutated *β-globin* construct with a nonsense codon at position 39 were gifts from Dr. Andreas E. Kulozik, University of Heidelberg, Germany.

### **Cell culture and transfections**

HEK 293 (human kidney cells, ATCC, CRL-1573) and BEAS-2B (human bronchial cells, ATCC, CRL-9609) were maintained in DMEM containing 10% FBS. The cells were transfected using Lipofectamine 2000 (Invitrogen) and harvested for protein or RNA extraction 48h after transfection, or luciferase activity 24h after transfection. The relative luciferase activity was measured in passive lysis buffer (Promega) using the Dual-Luciferase Assay System and a GloMax 20/20 luminometer (Promega) according to the manufacturer's instructions. Data were normalized against the activity of the co-transfected pRL-TK plasmid encoding Renilla luciferase (Promega). The small interfering RNAs (siRNAs) transfected to deplete *UPF1* or *NIK* are described in Supplementary Table 9.

## Protein analysis

Tissues were prepared with RIPA lysis buffer (Beyotime). The protein content was determined using the Bradford calorimetric assay (Shenergy Biocolor) and separated by sodium dodecyl sulfate-polyacrylamide gel electrophoresis, blotted on a membrane, and probed with antibodies (UPF1: rabbit monoclonal, abcam, ab109363 and ab92655, NIK: rabbit polyclonal, Santa Cruz, sc-7211 and GAPDH: mouse monoclonal, Beyotime, AG019) at 1:500 dilution. Conjugated affinity anti-mouse, or anti-rabbit IgG IRDye 800 (Rockland Immunochemicals), was used for secondary detection and imaged with Odyssey Infrared Imaging System (LI-COR Biosciences).

## IHC

Sections were deparaffinized two times in xylene, followed by serial dilutions of ethanol. After heat-induced antigen retrieval in antigen unmasking solution (Vector Laboratory), the internal peroxidase activity was quenched by incubation with 3% hydroperoxide in methanol for 15min. Sections were blocked in Avidin solution for 15min, incubated in Biotin solution for 15min (Vector Laboratory), incubated in 5% bovine serum albumin and 20% goat serum in PBS for 1h. Sections were then incubated overnight at 4°C with primary antibodies against UPF1 (rabbit monoclonal, Abcam, ab109363 and ab92655), IgE (mouse monoclonal, Santa Cruz, sc-52335) or NIK (rabbit polyclonal, Santa Cruz, sc-7211) at a 1:100 dilution.
